# Supplementary material
Source: HighWire-hosted journal article supplement (https://rapm.bmj.com/highwire/filestream/21713/field_highwire_adjunct_files/5/rapm-2022-104236supp006_data_supplement.pdf)
Supplement: rapm-2022-104236supp006_data_supplement.pdf [file rapm-2022-104236supp006_data_supplement.pdf]

Supplemental Table 6. Cox Model Results of Subsequent Spinal Procedures, Unmatched Cohorts without Adjusting for Patient Characteristics

| <b>Outcomes</b>                                                   | <b>HR (LCL, UCL) for<br/>ISD (vs MILD)</b> | <b>p value</b> |
|-------------------------------------------------------------------|--------------------------------------------|----------------|
| Any subsequent spine intervention                                 | 0.81 (0.73, 0.90)                          | <0.001         |
| LSS Intervention (i.e., open decompression, fusion, ISD, or MILD) | 0.75 (0.67, 0.84)                          | <0.001         |
| Open decompression                                                | 0.78 (0.66, 0.92)                          | 0.004          |
| Fusion                                                            | 0.86 (0.65, 1.14)                          | 0.295          |
| Subsequent ISD                                                    | 0.98 (0.79, 1.22)                          | 0.860          |
| Subsequent MILD                                                   | 0.22 (0.13, 0.37)                          | <0.001         |
| Other spine interventions                                         | 1.32 (1.07, 1.64)                          | 0.011          |
| Spinal cord stimulation                                           | 1.41 (1.03, 1.93)                          | 0.033          |

HR, hazard ratio; ISD, interspinous spacer; LCL, lower confidence limit; LSS, lumbar spinal stenosis; MILD, minimally invasive lumbar decompression; UCL, upper confidence limit
